# Supplementary material for: In situ fabrication of Ni nanoparticles on N-doped TiO2 nanowire arrays by nitridation of NiTiO3 for highly sensitive and enzyme-free glucose sensing
Source: Royal Society of Chemistry journal article supplement (doi:10.1039/c6tb02784a), 2017-01-01
Supplement: c6tb02784a1.pdf [file c6tb02784a1.pdf]

## Supporting information

### ***In situ fabrication of Ni nanoparticles on N-doped TiO<sub>2</sub> nanowire arrays by nitridation of NiTiO<sub>3</sub> for high-sensitivity and enzyme-free glucose sensing***

**Jiangwen Xu<sup>a#</sup>, Na Xu<sup>a,c#</sup>, Xuming Zhang<sup>a,d\*</sup>, Biao Gao<sup>a</sup>, Ben Zhang<sup>a</sup>, Xiang Peng<sup>d</sup>, Jijiang Fu<sup>a,c\*</sup>, Paul K. Chu<sup>d</sup>, Kaifu Huo<sup>b</sup>**

<sup>a</sup>The State Key Laboratory of Refractories and Metallurgy, School of Materials and Metallurgy, Wuhan University of Science and Technology, Wuhan 430081, P. R. China

<sup>b</sup>Wuhan National Laboratory for Optoelectronics, Huazhong University of Science and Technology, Wuhan, 430074, P. R. China

<sup>c</sup>Institute of Biology and Medicine, Wuhan University of Science and Technology, Wuhan, 430065, P. R. China

<sup>d</sup>Department of Materials Science and Physics, City University of Hong Kong, Tat Chee Avenue, Kowloon, Hong Kong, China

<sup>#</sup>These authors contributed equally to this work

# Calculations

Measurement of glucose concentration in human blood

Amperometric determination of Ni NPs/TiO<sub>x</sub>N<sub>y</sub> NWAs electrode towards real sample was carried out at in 10 ml NaOH (1 M) solution under stirring at the optimal potential of 0.37 V (vs SCE). As shown in Fig. 5d, the average value of enhanced current with successive twice addition of 100 μl fresh human blood was determined according to the calibration curve. The calculation was shown as below, while ΔI stand for the average enhanced current per 100 μl blood.

$$\Delta I = (12.6 \mu\text{A} + 11.7 \mu\text{A})/2 = 12.15 \mu\text{A}$$

According to the calibration curve in Fig 5b, the ΔI is in direct proportion to ΔC. While the ΔC stand for the glucose concentration in test solution. The C<sub>blood</sub> is the real concentration of glucose in blood.

$$I = 2.0612 \cdot 10^{-4} \cdot C + 0.0582$$

$$\Delta I = 2.0612 \cdot 10^{-4} \cdot \Delta C$$

$$\Delta C = 58.9 \mu\text{mol} / \text{L}$$

$$C_{\text{blood}} = \Delta C \cdot (10\text{ml}/100\mu\text{l}) = 5.89 \text{ mmol} / \text{L}$$

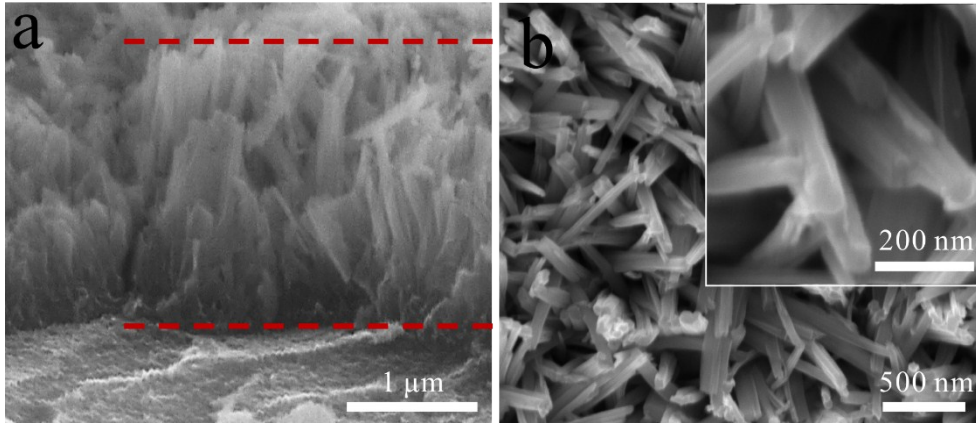

**Fig. S1.** (a) The SEM images of side view of  $\text{Na}_2\text{TiO}_3$  NWA. (b) The SEM images of  $\text{TiO}_x\text{N}_y$  NWAs

The  $\text{TiO}_x\text{N}_y$  NWAs was prepared by immersing  $\text{Na}_2\text{TiO}_3$  in 1 M HCl for overnight and subsequently washed and annealed in the  $\text{NH}_3$  at 500 °C for 3 h.

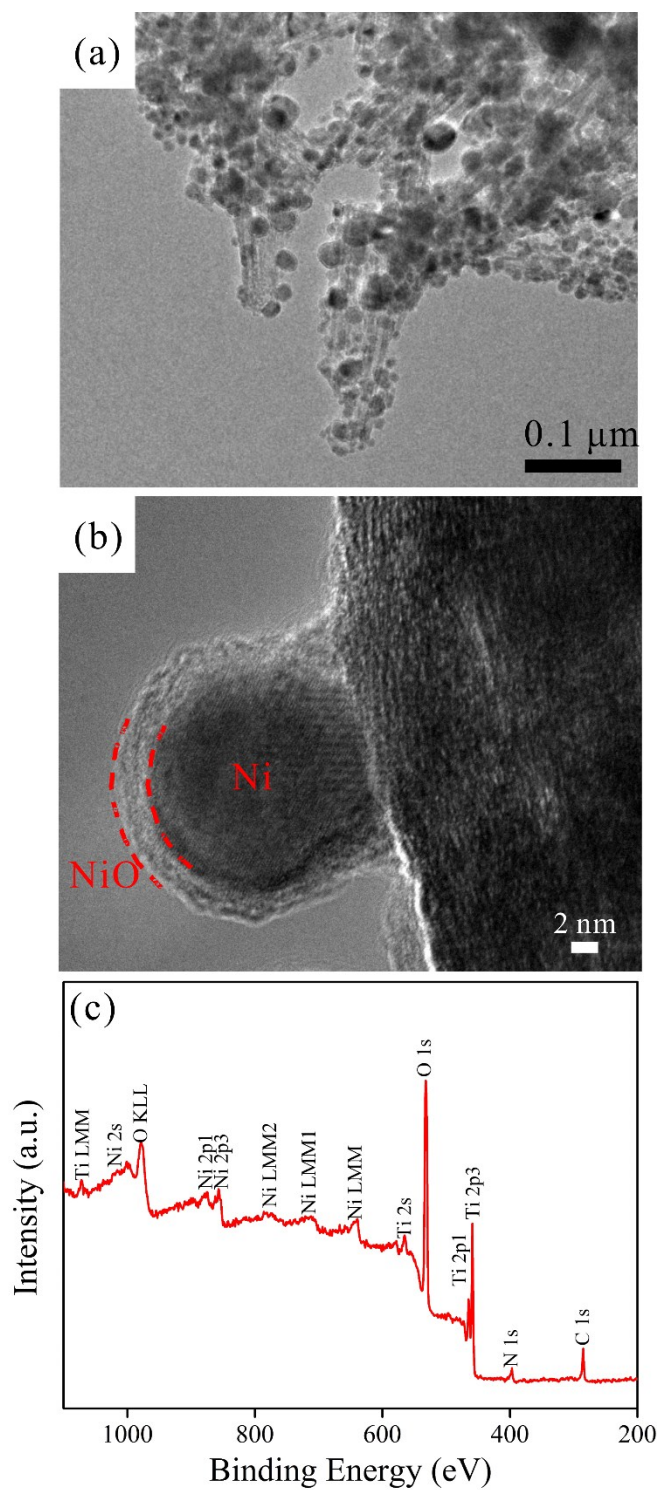

Fig. S2. (a) Low resolution TEM image of the Ni NPs/TiO<sub>x</sub>N<sub>y</sub> NWAs; (b) HR-TEM images of Ni NPs/TiO<sub>x</sub>N<sub>y</sub> NWAs. (c) Corresponding survey XPS spectra.

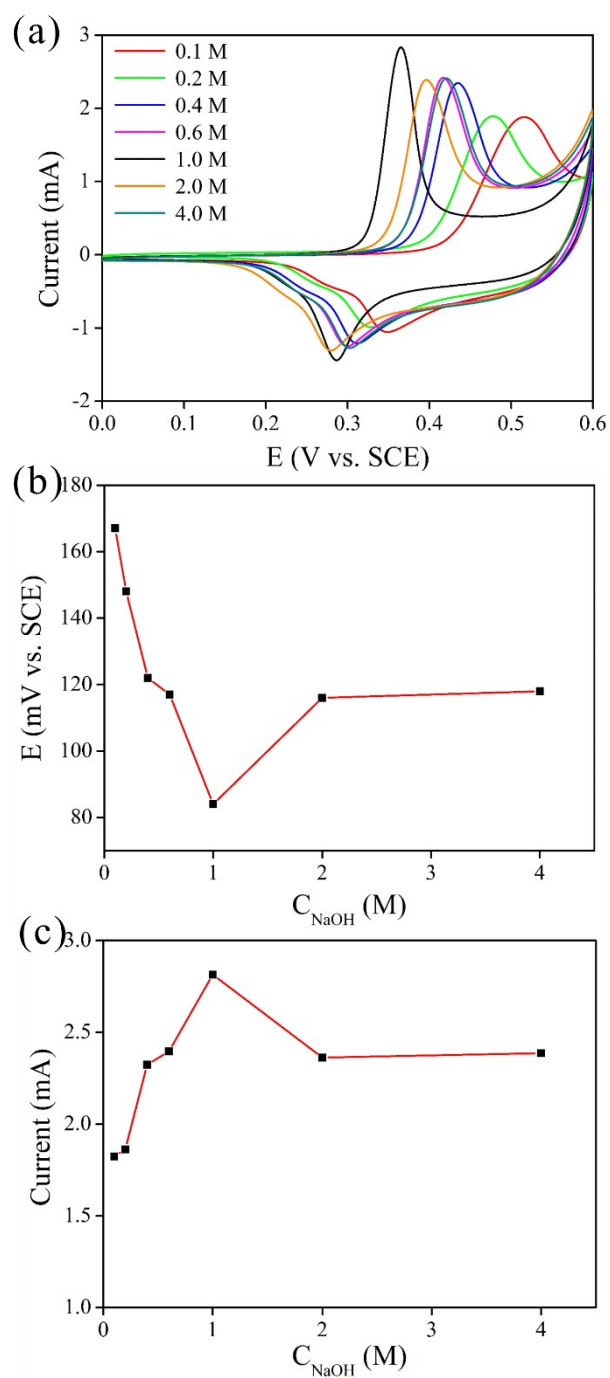

Fig. S3. (a) CVs of Ni NPs/TiO<sub>x</sub>N<sub>y</sub> NWAs at different concentration of NaOH from 0.1 to 4 M; (b) and (c) Corresponding peak potential separation ( $\Delta E_p$ ) and anodic peak current.

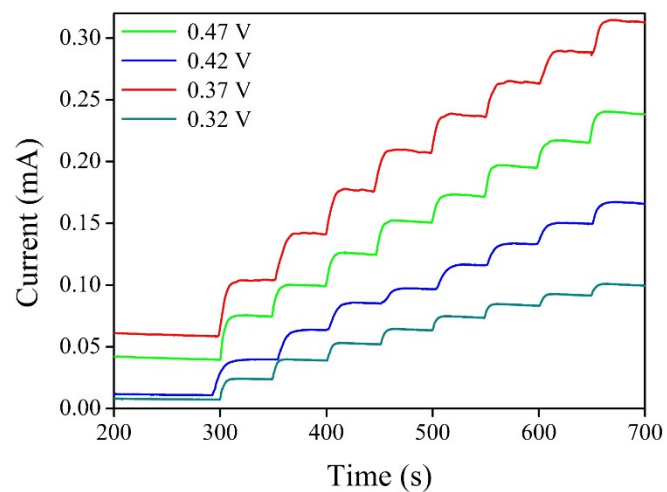

Fig. S4. Amperometric response of the Ni NPs/TiO<sub>x</sub>N<sub>y</sub> NWAs electrode by successive adding 1 mM glucose in 1 M NaOH at various applied potentials (V vs SCE).

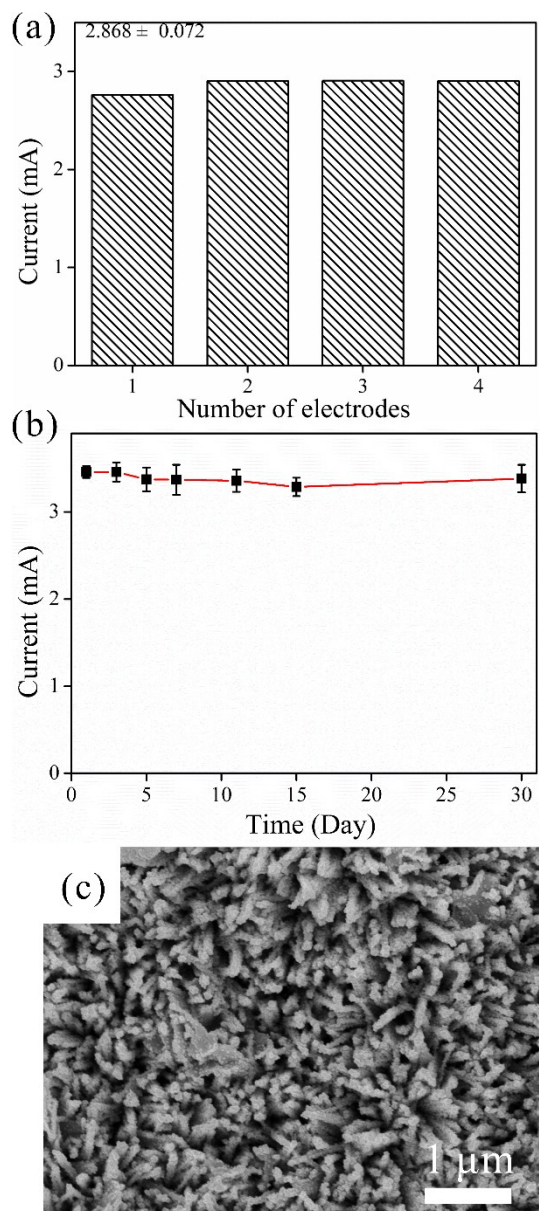

Fig. S5. (a) Anodic peak currents of CVs of four different Ni NPs/TiO<sub>x</sub>N<sub>y</sub> NWAs electrodes, in 1 M NaOH containing 2 mM of glucose at a scan rate of 50 mV s<sup>-1</sup>. (b) Stability of the Ni NPs/TiO<sub>x</sub>N<sub>y</sub> NWAs electrodes stored under ambient conditions. Peak current was measured in 1 M NaOH containing 2 mM of glucose (1, 3, 5, 7, 11, 15, 30 day). (c) The SEM image of the Ni NPs/TiO<sub>x</sub>N<sub>y</sub> NWAs after 30 days.

Table S1 Atomic ratio of different elements (Ni, Ti, N, O and C) observed in XPS of Ni NPs/TiO<sub>x</sub>N<sub>y</sub> NWAs.

| Sample                             | Ni  | Ti   | N   | O    | C    |
|------------------------------------|-----|------|-----|------|------|
| Ni/TiO <sub>x</sub> N <sub>y</sub> | 3.4 | 13.2 | 6.3 | 62.4 | 14.7 |
